# Supplementary material for: The Association between Body Mass Index and Intra-Cortical Myelin: Findings from the Human Connectome Project
Source: MDPI journal article supplement (doi:10.3390/nu13093221), 2021-09-16
Supplement: s1 [file s1]

Supplementary Table S1

Regions showing significant correlations between BMI and intra-cortical myelin after adjusting for HbA1c

| Region/Network               | partial<br>r value | Permutation p<br>value(−log10) |
|------------------------------|--------------------|--------------------------------|
| <b>Negative correlations</b> |                    |                                |
| SSN                          | 0.0660             | 0.0488                         |
| LMOFG                        | 0.0887             | 0.0113                         |
| L MTG                        | 0.0839             | 0.0227                         |
| L Perical                    | 0.0707             | 0.0424                         |
| L SMG                        | 0.1185             | 0.0008                         |
| L Insula                     | 0.1085             | 0.0007                         |
| R Cuneus                     | 0.1228             | 0.0003                         |
| R ITG                        | 0.045              | 0.1384                         |
| R PCG                        | 0.1027             | 0.004                          |
| R rACG                       | 0.1163             | 0.0006                         |
| <b>Positive correlations</b> |                    |                                |
| VAN                          | 0.1217             | 0.0002                         |
| L Cuneus                     | 0.1123             | 0.0024                         |
| L IFT                        | 0.1491             | 0.0001                         |
| L FP                         | 0.1265             | 0.0004                         |
| R FG                         | 0.0698             | 0.0302                         |
| R FP                         | 0.1772             | 0.0001                         |
| R TTG                        | 0.1025             | 0.0019                         |

L, left hemisphere; R, right hemisphere; SSN, somatosensory network; MOFG, Medial Orbitofrontal Gyrus; MTG, Middle Temporal Gyrus; Perical, Pericalcarine cortex; SMG, Supramarginal Gyrus; ITG, Inferior Temporal Gyrus; PCG, Posterior Cingulate Gyrus; rACG, Rostral Anterior Cingulate Gyrus; IFT, Lateral Frontal Triangularis; FP, Frontal Pole; FG, Fusiform Gyrus; TTG, Transverse Temporal Gyrus; VAN, ventral attention network.

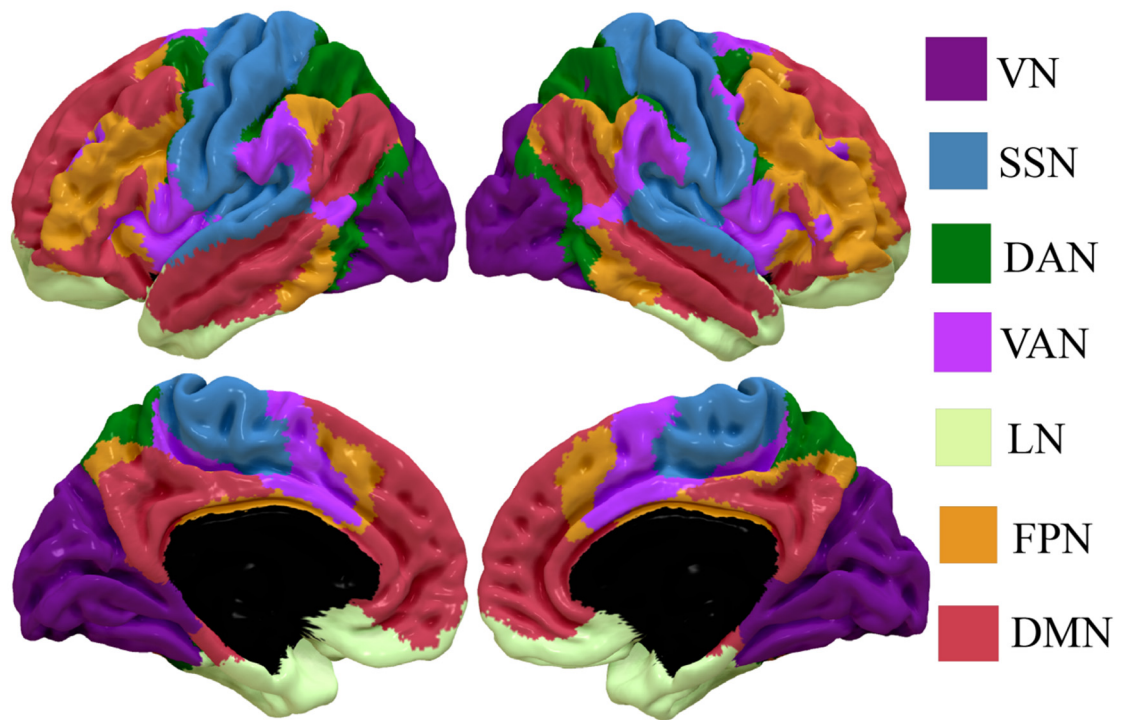

Supplementary Figure S1. Yeo brain network classification [1]. VN, visual network; SSN, somatosensory network; DAN, dorsal attention network; VAN, ventral attention network; LN, limbic network; FPN, frontal-parietal network; DMN, default mode network;

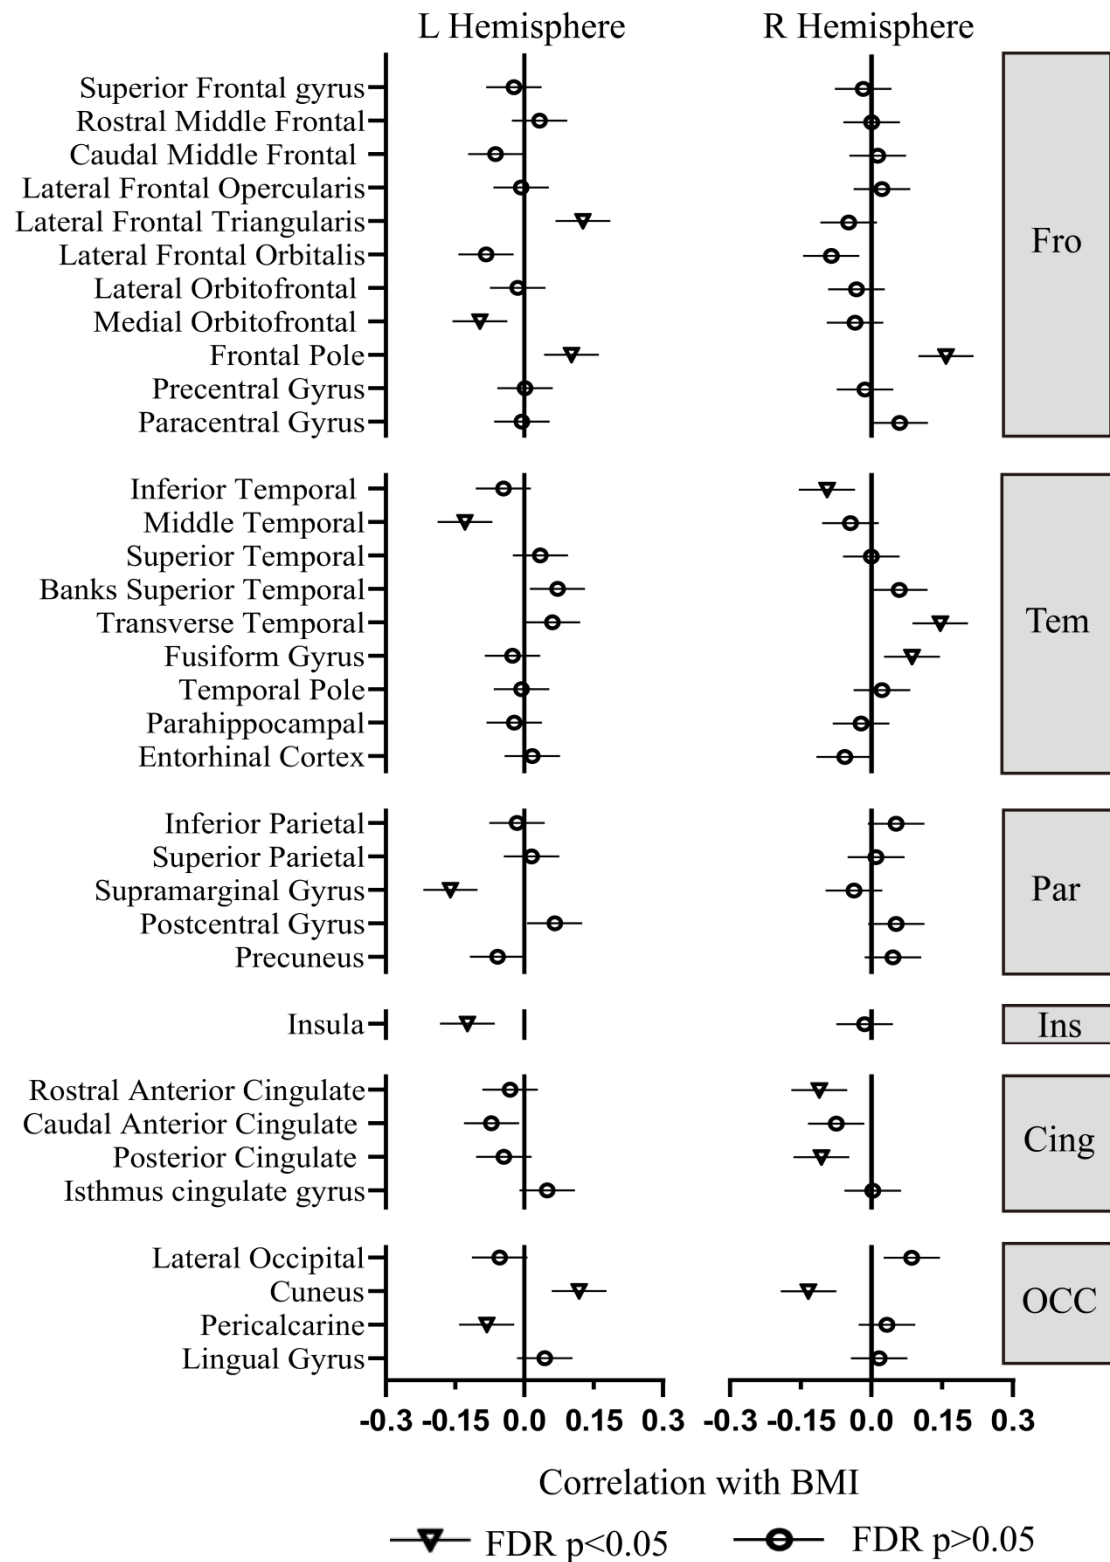

Supplementary Figure S2. The confidence intervals of all significant regions after adjusting for total intracranial volume. The error bar represents the 95% confidence intervals. Fro, frontal lobe; Tem, temporal lobe; Par, parietal lobe; Ins, insula; Cing, cingulate; OCC, occipital lobe.

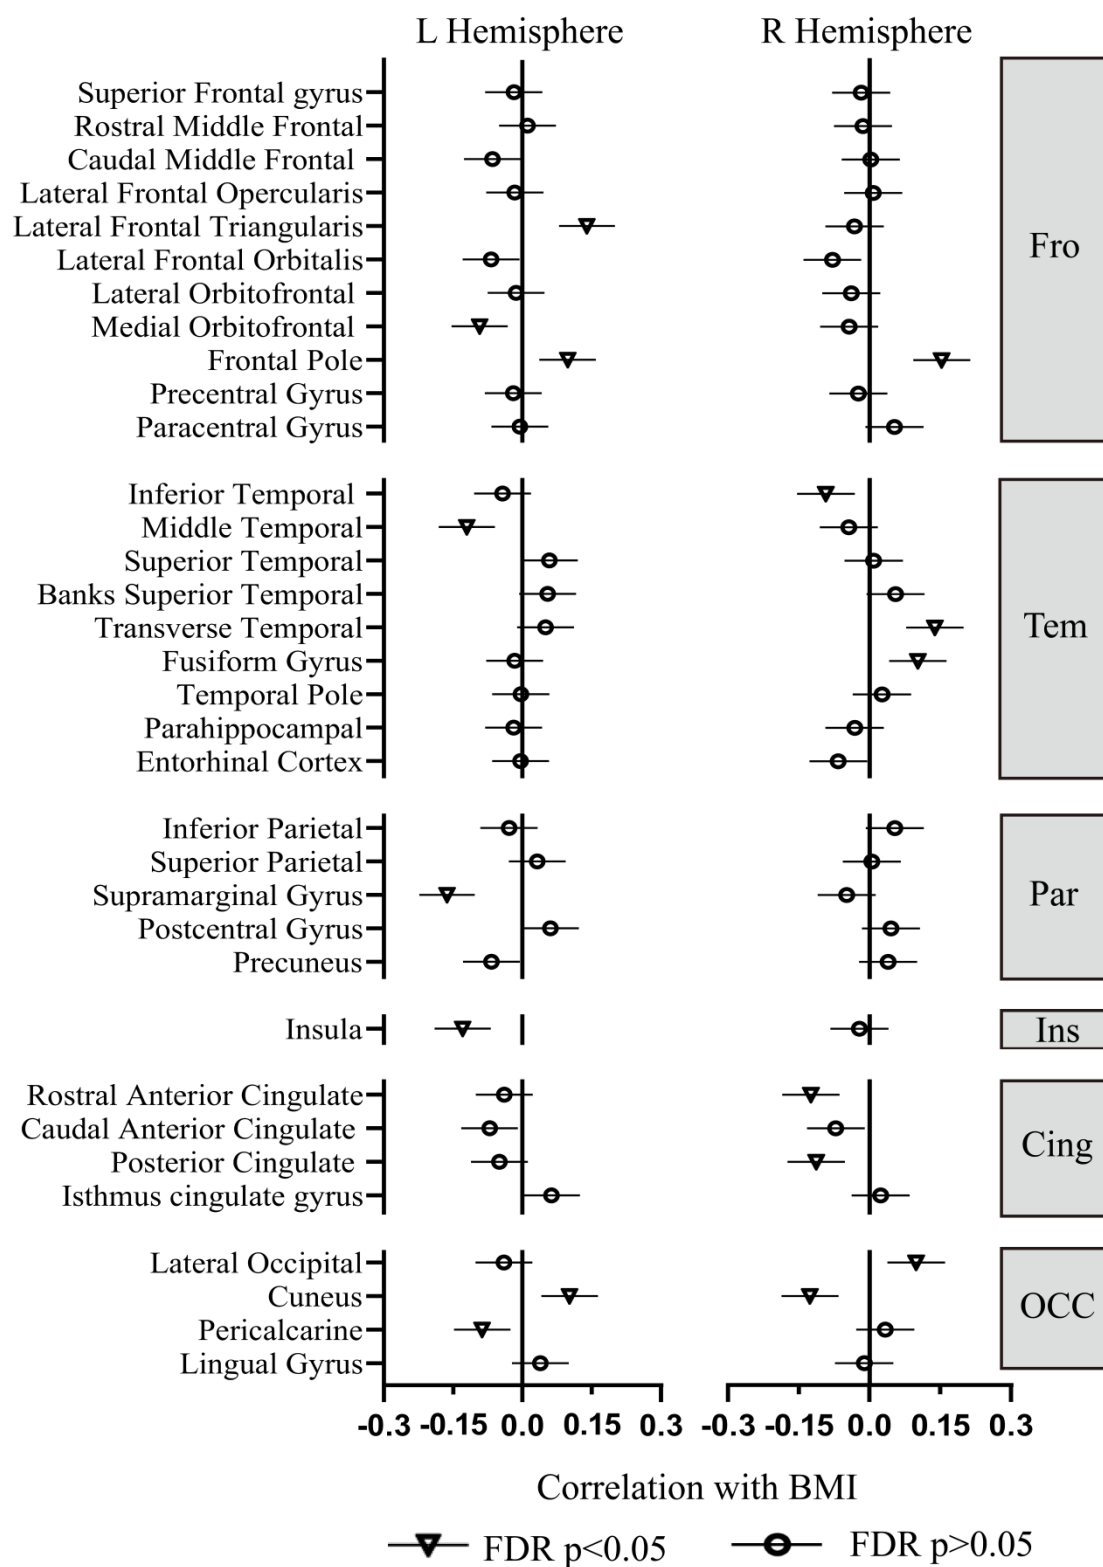

Supplementary Figure S3. The confidence intervals of all significant regions after adjusting for substance use. The error bar represents the 95% confidence intervals. Fro, frontal lobe; Tem, temporal lobe; Par, parietal lobe; Ins, insula; Cing, cingulate; OCC, occipital lobe.

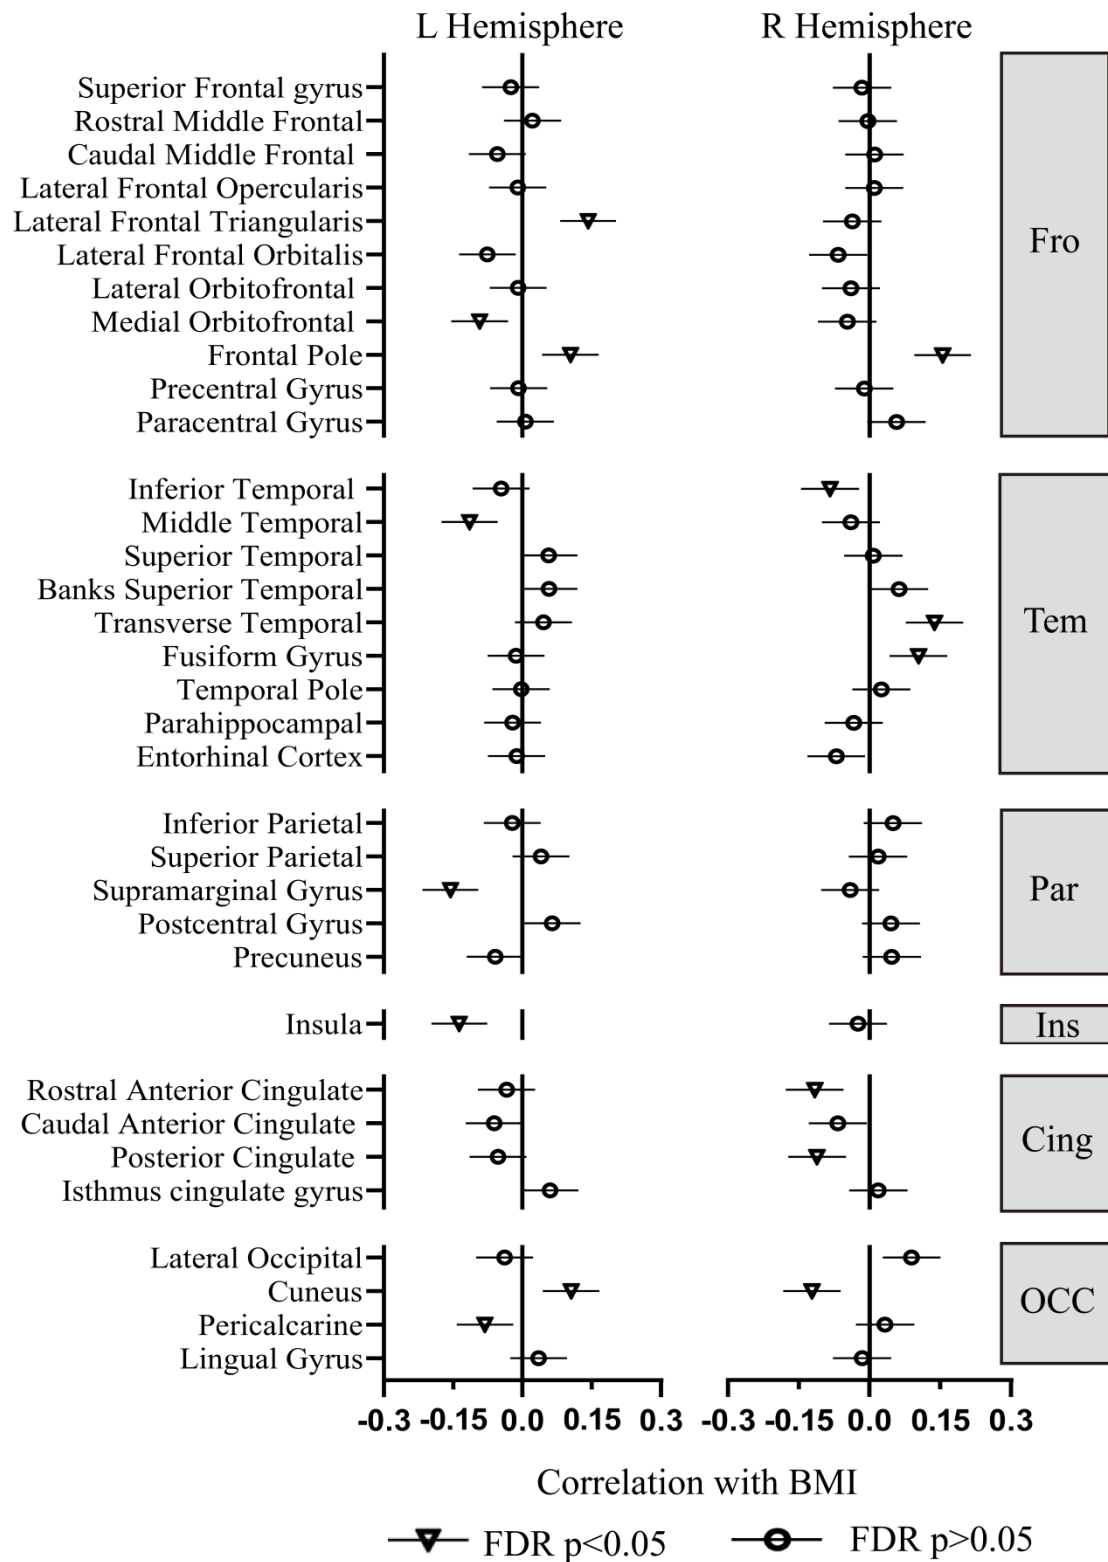

Supplementary Figure S4. The confidence intervals of all significant regions after adjusting for fluid intelligence. The error bar represents the 95% confidence intervals. Fro, frontal lobe; Tem, temporal lobe; Par, parietal lobe; Ins, insula; Cing, cingulate; OCC, occipital lobe.

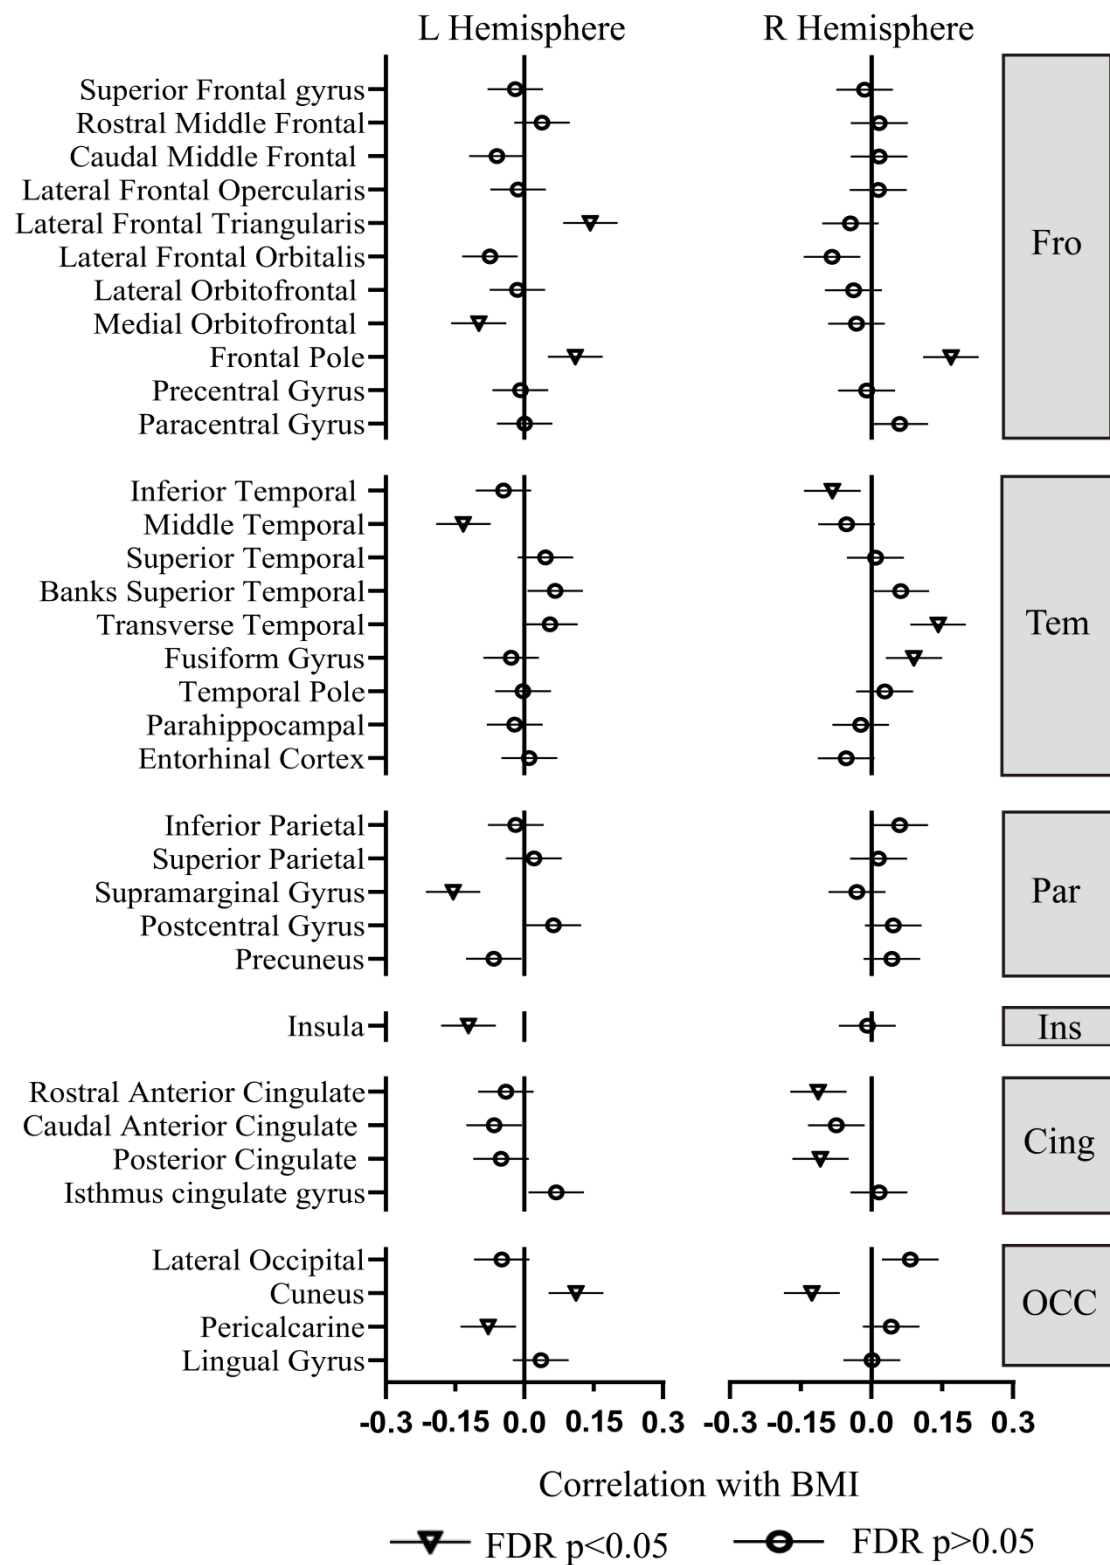

Supplementary Figure S5. The confidence intervals of all significant regions after adjusting for all covariates. The error bar represents the 95% confidence intervals. Fro, frontal lobe; Tem, temporal lobe; Par, parietal lobe; Ins, insula; Cing, cingulate; OCC, occipital lobe.

#### References in this material

1. Yeo, B.T.; Krienen, F.M.; Sepulcre, J.; Sabuncu, M.R.; Lashkari, D.; Hollinshead, M.; Roffman, J.L.; Smoller, J.W.; Zöllei, L.; Polimeni, J.R. The organization of the human cerebral cortex estimated by intrinsic functional connectivity. *J. Neurophysiol.* **2011**, 106, 1125–1165.
